# Supplementary material for: Short template switch events explain mutation clusters in the human genome
Source: HighWire-hosted journal article supplement (doi:10.1101/gr.214973.116), 2017-04-06
Supplement: Supplemental_Algorithm_S1.pdf [file Supplemental_Algorithm_S1.pdf]

## ***Short template switch events explain mutation clusters in the human genome***

Ari Löytynoja<sup>1</sup> and Nick Goldman<sup>2</sup>

<sup>1</sup>*Institute of Biotechnology, University of Helsinki, Helsinki, Finland;*

<sup>2</sup>*European Molecular Biology Laboratory, European Bioinformatics Institute (EMBL-EBI), Wellcome Genome Campus, Hinxton, UK*

### **Supplemental Algorithm S1: Dynamic programming algorithm to find optimal template-switch solution under the four-point model**

The algorithm defines the dynamic programming recursions to find the optimal alignment solution under the four-point mutation model. See also Supplemental Fig. S2.

Let sequences  $x$  and  $y$  consist of bases  $x_1, x_2, \dots, x_n$  and  $y_1, y_2, \dots, y_m$ . Function  $c(x_i)$  gives the complement of base  $x_i$ , function  $s(x_i, y_j)$  gives the score of matching bases  $x_i$  and  $y_j$ , and  $d$  is the indel penalty. In our implementation, the match score is 1 for two identical bases, otherwise  $-1$ , and the indel penalty is  $-2$ .

The algorithm for the template switch alignment differs from the standard linear-cost alignment of Sankoff<sup>1</sup> in two aspects. First, the algorithm consists of Recursions 1–3 that define three matrices,  $V_1$ ,  $V_2$  and  $V_3$ , and the alignment path must go via these matrices in order, starting with sequence fragment F1 in  $V_1$  and ending with F3 in  $V_3$ . Second, in matrix  $V_2$  the alignment proceeds backwards in respect to sequence  $y$  (generation of fragment F2 is in reverse direction; see Supplemental Fig. S2). Similarly to standard alignment, pointer matrices recording the move chosen at each cell  $(i, j)$ , including the jumps between the matrices, need to be stored. Once the recursions have been completed,  $V_3(n, m)$  holds the optimal score; the actual alignment solution is traced back using the pointer matrices.

Two variants of the algorithm allow for computing control statistics: with minor changes in Recursion 2, one can replace the search of a reverse-complement match in  $V_2$  with a search for a reverse match (denoted variant 2r) or a complement match (2c):

2r: **reverse:** within the ‘max’ term for  $V_2(i, j)$ ,  $s(x_i, c(y_j))$  is replaced by  $s(x_i, y_j)$

2c: **complement:** within the second loop,  $j = m, \dots, 1$  is replaced by  $j = 1, \dots, m$ ,  
and  $V_2(i - 1, j + 1)$  is replaced by  $V_2(i - 1, j - 1)$

In our analyses, we used variant 2r to compute control statistics.

We note that some event types can be reverted. While the direction of mutation could be determined using an outgroup, our approach considers just two sequences and finds only solutions consistent with the defined reference sequence.

---

<sup>1</sup>D Sankoff. Matching sequences under deletion-insertion constraints. *Proc. Natl. Acad. Sci. U. S. A.*, 69:4–6, 1972

---

**Supplemental Algorithm S1** Optimal template-switch solution under the four-point model
 

---

Initialisation:

- |                                                                                                                                                             |                                                                                                                                                                                           |
|-------------------------------------------------------------------------------------------------------------------------------------------------------------|-------------------------------------------------------------------------------------------------------------------------------------------------------------------------------------------|
| $V_1(0, 0)$ is set to 0<br>$V_2(\bullet, m + 1)$ and $V_2(0, \bullet)$ are set to $-\infty$<br>$V_3(\bullet, 0)$ and $V_3(0, \bullet)$ are set to $-\infty$ | $\triangleright$ Alignment path must start from $V_1(0, 0)$<br>$\triangleright$ Optimal path in $V_2$ must come from $V_1$<br>$\triangleright$ Optimal path in $V_3$ must come from $V_2$ |
|-------------------------------------------------------------------------------------------------------------------------------------------------------------|-------------------------------------------------------------------------------------------------------------------------------------------------------------------------------------------|

Recursion 1:

- |                                                                                                                                                                                                                                                    |                                                                                                                                                                                               |
|----------------------------------------------------------------------------------------------------------------------------------------------------------------------------------------------------------------------------------------------------|-----------------------------------------------------------------------------------------------------------------------------------------------------------------------------------------------|
| <b>for</b> $i = 0, \dots, n$ <b>do</b><br><b>for</b> $j = 0, \dots, m$ <b>do</b><br><br>$V_1(i, j) = \max \begin{cases} V_1(i - 1, j - 1) + s(x_i, y_j) \\ V_1(i - 1, j) + d \\ V_1(i, j - 1) + d \end{cases}$<br><b>end for</b><br><b>end for</b> | $\triangleright$ Find optimal path for $V_1$<br>$\triangleright$ Loop over sequence $x$<br>$\triangleright$ Loop over sequence $y$<br><br>$\triangleright$ Select best move (match or indel). |
|----------------------------------------------------------------------------------------------------------------------------------------------------------------------------------------------------------------------------------------------------|-----------------------------------------------------------------------------------------------------------------------------------------------------------------------------------------------|

Recursion 2:

- |                                                                                                                                                                                                                                                                       |                                                                                                                                                                                                                                                            |
|-----------------------------------------------------------------------------------------------------------------------------------------------------------------------------------------------------------------------------------------------------------------------|------------------------------------------------------------------------------------------------------------------------------------------------------------------------------------------------------------------------------------------------------------|
| <b>for</b> $i = 1, \dots, n$ <b>do</b><br>$c = \max(V_1(i - 1, \bullet));$<br><b>for</b> $j = m, \dots, 1$ <b>do</b><br><br>$V_2(i, j) = \max \begin{cases} c + s(x_i, c(y_j)) \\ V_2(i - 1, j + 1) + s(x_i, c(y_j)) \end{cases}$<br><b>end for</b><br><b>end for</b> | $\triangleright$ Find optimal path for $V_2$<br>$\triangleright$ Loop over sequence $x$<br>$\triangleright$ Best score for a jump from $V_1$<br>$\triangleright$ Backwards loop over sequence $y$<br><br>$\triangleright$ Select best move (jump or match) |
|-----------------------------------------------------------------------------------------------------------------------------------------------------------------------------------------------------------------------------------------------------------------------|------------------------------------------------------------------------------------------------------------------------------------------------------------------------------------------------------------------------------------------------------------|

Recursion 3:

- |                                                                                                                                                                                                                                                                                                           |                                                                                                                                                                                                                                                         |
|-----------------------------------------------------------------------------------------------------------------------------------------------------------------------------------------------------------------------------------------------------------------------------------------------------------|---------------------------------------------------------------------------------------------------------------------------------------------------------------------------------------------------------------------------------------------------------|
| <b>for</b> $i = 1, \dots, n$ <b>do</b><br>$c = \max(V_2(i - 1, \bullet));$<br><b>for</b> $j = 1, \dots, m$ <b>do</b><br><br>$V_3(i, j) = \max \begin{cases} c + s(x_i, y_j) \\ V_3(i - 1, j - 1) + s(x_i, y_j) \\ V_3(i - 1, j) + d \\ V_3(i, j - 1) + d \end{cases}$<br><b>end for</b><br><b>end for</b> | $\triangleright$ Find optimal path for $V_3$<br>$\triangleright$ Loop over sequence $x$<br>$\triangleright$ Best score for a jump from $V_2$<br>$\triangleright$ Loop over sequence $y$<br><br>$\triangleright$ Select best move (jump, match or indel) |
|-----------------------------------------------------------------------------------------------------------------------------------------------------------------------------------------------------------------------------------------------------------------------------------------------------------|---------------------------------------------------------------------------------------------------------------------------------------------------------------------------------------------------------------------------------------------------------|
-
