# Supplementary material for: Short template switch events explain mutation clusters in the human genome
Source: HighWire-hosted journal article supplement (doi:10.1101/gr.214973.116), 2017-04-06
Supplement: Supplemental_Table_S2.xlsx [file Supplemental_Table_S2.xlsx]

## Sheet: supplemental_table_2
Supplemental Table S2
The genetic linkage (relative linkage disequilibrium D´ [Lewontin, RC. Genetics, 49:49–67, 1964]) and the standard deviation of 1KG global allele frequencies for template switch events detected between two humans.
Position (GRCh37)	D´	SD(AF)
chr1:8583720-8583736	0.992947	0.000423557
chr1:58225718-58225744	1	0
chr1:68552103-68552132	0.995312	0.00166853
chr1:177614385-177614422	-	-
chr2:44545734-44545772	0.999003	0.0165223
chr2:113399116-113399133	1	0
chr2:141481114-141481130	1	0
chr2:177656645-177656662	0.999654	0.00011547
chr2:192808311-192808331	0.996725	0.000114893
chr2:236077394-236077409	1	0
chr3:85078066-85078133	1	0.309811
chr3:163871744-163871758	1	0
chr3:170821849-170821880	0.987188	0.0063525
chr4:43027132-43027152	1	0
chr4:54752568-54752582	0.997301	0.0272512
chr4:175312410-175312423	-	-
chr4:182127597-182127623	1	0
chr5:41047165-41047178	0.998353	0.00153649
chr5:107452444-107452460	1	0.0155316
chr5:120770300-120770325	1	0
chr6:3027013-3027033	0.999111	0.00126786
chr6:4365709-4365735	0.968706	9.95e-05
chr6:105308170-105308190	1	0.57735
chr6:128673556-128673569	1	0
chr6:129988189-129988211	1	0
chr6:151077057-151077091	0.998503	0.00220935
chr7:9995542-9995576	0.997928	0.0210728
chr7:118367022-118367036	1	0
chr8:78174872-78174903	1	0.0001
chr8:139290452-139290493	-	-
chr9:73792526-73792553	0.99869	0.0117223
chr9:87283156-87283169	0.994658	0.000988535
chr9:122667309-122667335	0.998642	0.57735
chr10:3173066-3173095	0.999262	0.00336736
chr10:29421801-29421866	1	0.145887
chr10:72001951-72001968	0.992112	0.41021
chr11:73442141-73442164	1	0.000399
chr12:130252986-130253045	0.957448	0.0628885
chr13:113111734-113111749	0.998874	0.0003995
chr14:31692897-31692925	1	0
chr15:36259779-36259809	0.993165	0.00174081
chr16:12708977-12709007	1	0.201113
chr17:33622098-33622114	0.996846	0.000501
chr17:59744593-59744623	1	0.00046682
chr18:69556840-69556858	1	0
chr19:767508-767527	1	0
chr19:38062901-38062937	0.994298	0.000735555
chr21:16013327-16013340	1	0.00142134
chr22:18938180-18938203	1	0
chr22:46457691-46457720	1	9.984e-05
chrX:69286974-69286995	1	0.000152998
